# Supplementary material for: Octaethylporphyrin and expanded porphyrin complexes containing coordinated BF2groups
Source: Royal Society of Chemistry journal article supplement (doi:10.1039/b400596a), 2004-01-01
Supplement: b400596a.doc [file b400596a.doc]

Octaethylporphyrin and expanded porphyrin complexes containing coordinated BF2 groups

Thomas Köhler,*a* Michael C. Hodgson,*b* Daniel Seidel,*a* Jacqueline M. Veauthier, *a* Sylvie Meyer,*a* Vincent Lynch,*a* Peter D. W. Boyd,**b* Penelope J. Brothers,**b* and Jonathan L. Sessler**a*

a Department of Chemistry and Biochemistry, The University of Texas at Austin, 1 University Station A5300, Austin TX 78712-0165, USA. Fax: 1 512 471 7550; Tel:1 512 471 5009; E-mail: sessler@mail.utexas.edu

b Department of Chemistry, The University of Auckland, Private Bag 92109, Auckland, New Zealand. Fax: 649 373 7422; Tel: 649 373 7599; E-mail:p.brothers@auckland .ac.nz

**Supporting Information**

I Synthetic Experimental

II X-ray Experimental

***I Synthetic Experimental:***

All solvents and chemicals were obtained commercially and used as received. Proton,13C-NMR, 11B-NMR, and 19F-NMR spectra were measured at 25 ºC a Bruker AM 400 or Varian Unity Innova 500. UV-vis spectra were recorded on a BECKMAN DU 640B spectrophotometer. High resolution CI mass spectra were obtained on a VG ZAB2-E mass spectrometer, high resolution FAB mass spectra on a VG-7070, matrix m-nitrobenzylalcohol.

**Preparation of 4**

A solution of H2OEP (250 mg, 0.47 mmol) in dichloromethane (30 mL) and triethylamine (1 mL) was stirred at rt. To this solution was added BF3.OEt2 (4.48 mL, 28.2 mmol) slowly. On addition a small amount of white gas was formed and the solution changed colour from a red-brown to crimson. The reaction mixture was then stirred for 1 hour. After this time a 10% solution of NaOH was added and the organic layer was then separated, dried and the volume reduced to approx. 10 mL. The very dark crimson solution was then chromatographed on silica gel (2.5 x 12 cm). The first red-brown band was eluted with dichloromethane:triethylamine (99.5:0.5) and was shown to be H2OEP. The second and major band was eluted with a mixture of dichloromethane:methanol:triethylamine (94.5:5:0.5). This crimson solution was then taken to dryness to yield a crimson solid of the title compound (235 mg, 82%).

1H NMR (400 MHz, CDCl3): δ 10.94 (s, 2H, *meso* H), 10.16 (s, 1H, *meso* H), 10.13 (s, 1H, *meso* H), 4.19 (m, 16H, -*CH2*CH3), 1.91 (m, 24H, -CH2*CH3*); 13C NMR (101 MHz, CDCl3): δ 17.96, 18.19, 18.37, 19.17, 20.06, 20.15, 96.31, 99.42, 102.21, 137.52, 138.47, 139.12, 142.03, 147.15, 147.87; 11B NMR (128 MHz, CDCl3): δ -13.5, 16.1 (br. s); 19F NMR (376 MHz, CDCl3): δ -133.9 (s), -153.7 (br. s); HRMS (EI, 70keV): m/z 608.3662 ((M+), calcd for C36H4411BF2N4O 608.3669). UV-vis (CH2Cl2) λmax [nm] (log ε) ): 400 (5.13), 548 (3.92), 592 (3.64).

**Preparation of 5:**

A solution of H2OEP (250 mg, 0.47 mmol) in dry dichloromethane (30 mL) and triethylamine (1 mL) was stirred at rt under argon. To this solution was added triply distilled BF3.OEt2 (4.48 mL, 28.2 mmol) slowly. On addition a small amount of white gas was formed and the solution changed colour from a red-brown to crimson. The reaction mixture was then stirred for 1 hour. The solution was then reduced in volume (approx. 10 mL) and placed in the freezer. On cooling a crimson precipitate formed, this was isolated by filtering under argon to yield the title compound as a crimson solid (187 mg, 69%).

1H NMR (CDCl3): δ 11.38 (s, 2H, *meso* H), 10.46 (s, 2H, *meso* H), 4.21 (m, 16H, -*CH2*CH3), 1.95 (m, 24H, -CH2*CH3*); 19F NMR (CDCl3): δ -153.4 (br. s).

**Preparation of 6,7:**

Free base amethyrin (101 mg, 0.17 mmol) was dissolved in 30 ml of chloroform. Triethylamine (0.75 mL), freshly distilled, was added and stirred for 10 min. Subsequently, 1.69 mL (11.9 mmol) BF3.OEt2 was added at R.T., stirred for 10 min. and subjected to reflux for 30 min. The resulting mixture was washed with NaOH and chromatographed on silica. The purple band, consistent of **6,** elutes first. The mono BF2 complex **7**, a red-orange band, is separated by increasing the polarity of the eluent from 99.8% DCM, 0.2% TEA to 94.8% DCM, 0.2% TEA, 5% MeOH.

Another red-orange band resembles the free base amethyrin. Recrystallization of the compounds with hexanes/DCM afforded:

**6**: 20.7 mg (0.03 mmol,18%). 1H-NMR (500 MHz, CDCl3) δ [ppm] 1.67 (s, CH3, 36H), 5.55 (s, CH meso, 2H), 15.52 (bs, NH, 2H); ); 13C-NMR (125 MHz, CDCl3) δ [ppm] 9.2, 9.8, 10.7, 31.5, 131.9, 149.0; HRMS (CI): *m/z* 678.3451 ((M+), calcd for C38H4011B2N6F4 678.3437). UV-vis (CH2Cl2) λmax [nm] (ε in mol-1•cm-1) 512(54650), 587(46685).

**7:** 12.1 mg (0.02 mmol, 12%)1H-NMR (500 MHz, CDCl3) δ [ppm] 1.53 (s, CH3, 12H), 1.69 (s, CH3, 24H), 5.33 (s, CH meso, 1H), 5.60 (s, CH meso, 1H), NH n.d.; 13C-NMR (125 MHz, CDCl3) δ [ppm] 9.1, 9.2, 10.2, 10.6, 10.8, 11.1, 29.4, 29.7, 126.6, 130.0, 148.7; HRMS (CI): *m/z* 630.3448 ((M+H), calcd for C38H4111BN6F2 630.3454. UV-vis (CH2Cl2) λmax [nm] (ε in mol-1•cm-1) 501(69710).

**Preparation of 8, 9:**

Free base octaphyrin (104 mg, 0.13 mmol) was dissolved in 30 ml of chloroform. Triethylamine (0.75 mL), freshly distilled, was added and stirred for 10 min. Subsequently, 1.30 mL (9.16 mmol) BF3.OEt2 was added at R.T., stirred for 10 min. and subjected to reflux for 30 min. The resulting mixture was washed with NaOH and chromatographed on silica. The dark ink-blue band of **8** comes off first. The purple band of **9** is separated by increasing the polarity of the eluent from 99.8% DCM, 0.2% TEA to 98.3% DCM, 0.2% TEA, 1.5% MeOH. Recrystallization of the compounds with hexanes/DCM afforded:

**8**: 15.7 mg (0.02 mmol, 14%). 1H-NMR (500 MHz, CDCl3) δ [ppm] 1.24 (s, CH3, 24H), 1.53 (s, CH3, 24H), 5.28 (s, CH meso, 2H), 9.15 (bs, NH, 2H); ); 13C-NMR (125 MHz, CDCl3) δ [ppm] 10.07, 10.10, 10.7, 14.1, 29.7, quartery carbons n.d.; HRMS (CI): *m/z* 865.4699 ((M+H), calcd for C50H5511B2N8F4 865.4594). UV-vis (CH2Cl2) λmax [nm] (ε in mol-1•cm-1) 536(30101), 638(39653).

**9:** 10.6 mg (0.01 mmol, 10%). HRMS (CI): *m/z* 817.4699((M+H), calcd for C50H5511BN8F2 817.4689). UV-vis (CH2Cl2) λmax [nm] (ε in mol-1•cm-1) 539(12279).

***II X-ray Experimental:***

II.1 B2OF2(OEP) complex **4**

Table 1. Crystal data and structure refinement for **4**.

Empirical formula C42 H60 B3 F6 N5 O

Formula weight 797.38

Temperature 153(2) K

Wavelength 0.71073 Å

Crystal system Triclinic

Space group P1

Unit cell dimensions a = 10.2302(3) Å = 88.661(2)°.

b = 13.7883(5) Å = 84.853(2)°.

c = 15.1221(6) Å  = 79.504(2)°.

Volume 2088.88(13) Å3

Z 2

Density (calculated) 1.268 Mg/m3

Absorption coefficient 0.094 mm-1

F(000) 848

Crystal size 0.50 x 0.11 x 0.09 mm

Theta range for data collection 2.98 to 22.43°.

Index ranges -10<=h<=10, -14<=k<=14, -15<=l<=16

Reflections collected 9847

Independent reflections 9847

Completeness to theta = 22.43° 99.5 %

Absorption correction None

Refinement method Full-matrix-block least-squares on F2

Data / restraints / parameters 9847 / 46 / 1037

Goodness-of-fit on F2 1.150

Final R indices [I>2sigma(I)] R1 = 0.0708, wR2 = 0.1162

R indices (all data) R1 = 0.1522, wR2 = 0.1393

Absolute structure parameter -0.5(9)

Extinction coefficient 4.5(7)x10-6

Largest diff. peak and hole 0.367 and -0.280 e.Å-3

X-ray Experimental for 2[(C36H44N4B2F2O)(BF4)1-(C6H16N)1+]: Crystals grew as very dark needles by slow evaporation from dichloromethane. The data crystal was a long needle that had approximate dimensions; 0.50 x 0.11 x 0.09 mm. The data were collected on a Nonius Kappa CCD diffractometer using a graphite monochromator with MoK radiation ( = 0.71073Å). A total of 320 frames of data were collected using -scans with a scan range of 0.9 and a counting time of 168 seconds per frame. The data were collected at 153 K using an Oxford Cryostream low temperature device. Details of crystal data, data collection and structure refinement are listed in Table 1. Data reduction were performed using DENZO-SMN.1 The structure was solved by direct methods using SIR972 and refined by full-matrix least-squares on F2 with anisotropic displacement parameters for the non-H atoms using SHELXL-97.3 The hydrogen atoms were calculated in ideal positions with isotropic displacement parameters set to 1.2xUeq of the attached atom (1.5xUeq for methyl hydrogen atoms).

The space group is non-centrosymmetric, P1 (Number 1), with Z’ = 2. There is an approximate, non-crystallographic inversion center between molecules of the macrocycle at 0.52, 0.33, 0.47. No approximate inversion center exists relating the tetrafluoroborate anions. One of the methyl carbons (C28’) on macrocycle 2 was found to be disordered about two orientations of occupancy 58(2)% for C28’ and 42(2)% for C28a. The bond length of these methyl carbons to the methylene carbon atom, C27’, were restrained to be equivalent.

The function, w(|Fo|2 - |Fc|2)2, was minimized, where w = 1/[((Fo))2 + (0.02*P)2] and P = (|Fo|2 + 2|Fc|2)/3. Rw(F2) refined to 0**.**139, with R(F) equal to 0.0708 and a goodness of fit, S, = 1.17. Definitions used for calculating R(F), Rw(F2) and the goodness of fit, S, are given below.4 The data were corrected for secondary extinction effects. The correction takes the form: Fcorr = kFc/[1 + (4.5(7)x10-6)* Fc2 3/(sin2)]0.25 where k is the overall scale factor. Neutral atom scattering factors and values used to calculate the linear absorption coefficient are from the International Tables for X-ray Crystallography (1992).5 All figures were generated using SHELXTL/PC.6

**References**

1. DENZO-SMN. (1997). Z. Otwinowski and W. Minor, Methods in Enzymology, **276**: Macromolecular Crystallography, part A, 307 – 326, C. W. Carter, Jr. and R. M. Sweets, Editors, Academic Press.
2. SIR97. (1999). A program for crystal structure solution. Altomare A., Burla M.C., Camalli M., Cascarano G.L., Giacovazzo C. , Guagliardi A., Moliterni A.G.G., Polidori G.,Spagna R. J. Appl. Cryst. 32, 115-119.
3. Sheldrick, G. M. (1994). SHELXL97. Program for the Refinement of Crystal Structures. University of Gottingen, Germany.
4. Rw(F2) = {w(|Fo|2 - |Fc|2)2/w(|Fo|)4}1/2 where w is the weight given each reflection.

R(F) = (|Fo| - |Fc|)/|Fo|} for reflections with Fo > 4((Fo)).

S = [w(|Fo|2 - |Fc|2)2/(n - p)]1/2, where n is the number of reflections and p is the number of refined parameters.

1. International Tables for X-ray Crystallography (1992). Vol. C, Tables 4.2.6.8 and 6.1.1.4, A. J. C. Wilson, editor, Boston: Kluwer Academic Press.

6) Sheldrick, G. M. (1994). SHELXTL/PC (Version 5.03). Siemens Analytical X-ray Instruments, Inc., Madison, Wisconsin, USA.

Figure 1. View of molecule 1 in **4** showing the atom labeling scheme. Displacement ellipsoids are scaled to the 50% probability level. Most hydrogen atoms have been removed for clarity.

Figure 2. View of the H-bonding interaction between one of the cations and molecule 1 in **4** showing a partial atom labeling scheme. Displacement ellipsoids are scaled to the 30% probability level. Most hydrogen atoms have been removed for clarity. The H-bonding interaction is shown as a dashed line with geometry: N1a-H1a…O1, N…O 2.788(7)Å, H…O 1.89Å, N-H…O 173°.

Figure 3. View of molecule 2 in **4** showing the atom labeling scheme. Displacement ellipsoids are scaled to the 50% probability level. Most hydrogen atoms have been removed for clarity. The methyl carbon (C28’ and C28a) was disordered about two orientations as shown below.

Figure 4. View of the H-bonding interaction between one of the cations and molecule 2 in **4** showing a partial atom labeling scheme. Displacement ellipsoids are scaled to the 30% probability level. Most hydrogen atoms have been removed for clarity. The H-bonding interaction is shown as a dashed line with geometry: N1b-H1b…O1’, N…O 2.803(7)Å, H…O 1.93Å, N-H…O 164°.

II.2 (BF2)2amethyrin complex **6**

Table 2. Crystal data and structure refinement for **6**.

Empirical formula C44 H54 B2 Cl2 F4 N6

Formula weight 835.45

Temperature 153(2) K

Wavelength 0.71073 Å

Crystal system Orthorhombic

Space group P212121

Unit cell dimensions a = 13.4372(1) Å = 90°.

b = 15.8642(1) Å = 90°.

c = 20.6260(2) Å  = 90°.

Volume 4396.85(6) Å3

Z 4

Density (calculated) 1.262 Mg/m3

Absorption coefficient 0.203 mm-1

F(000) 1760

Crystal size 0.38 x 0.23 x 0.11 mm

Theta range for data collection 2.98 to 27.48°.

Index ranges -17<=h<=17, -20<=k<=20, -26<=l<=26

Reflections collected 10067

Independent reflections 10067 [R(int) = 0.0000]

Completeness to theta = 27.48° 99.8 %

Absorption correction None

Refinement method Full-matrix least-squares on F2

Data / restraints / parameters 10067 / 0 / 461

Goodness-of-fit on F2 1.129

Final R indices [I>2sigma(I)] R1 = 0.0649, wR2 = 0.1675

R indices (all data) R1 = 0.0811, wR2 = 0.1769

Absolute structure parameter 0.4(8)

Extinction coefficient 5.2(12)X10-6

Largest diff. peak and hole 0.55 and -0.26 e.Å-3

X-ray Experimental for C38H40N6B2F2 - CH2Cl2 – C5H12: Crystals grew as very dark, fairly large plate and lathes by vapor diffusion of pentane into a methylene chloride solution of the macrocycle. The data crystal had approximate dimensions; 0.38 x 0.23 x 0.11 mm. The data were collected on a Nonius Kappa CCD diffractometer using a graphite monochromator with MoK radiation ( = 0.71073Å). A total of 461 frames of data were collected using -scans with a scan range of 1 and a counting time of 137 seconds per frame. The data were collected at –120 C using a Oxford Cryostream low temperature device. Details of crystal data, data collection and structure refinement are listed in Table 1. Data reduction were performed using DENZO-SMN.1 The structure was solved by direct methods using SIR922 and refined by full-matrix least-squares on F2 with anisotropic displacement parameters for the non-H atoms using SHELXL-97.3 The hydrogen atoms on carbon were calculated in ideal positions with isotropic displacement parameters set to 1.2xUeq of the attached atom (1.5xUeq for methyl hydrogen atoms). The hydrogen atoms bound to nitrogen were located in a F map and refined with isotropic displacement parameters. In addition to the macrocycle and around and along a crystallographic screw axis at x, ¾ , 0, there appeared to be some disordered n-pentane concentrated in two regions. Refinement without restraints indicated severe disorder, resulting in very large displacement parameters. It appeared that the n-pentane was disordered along a solvent channel parallel to the **a** axis around the crystallographic screw axis (Figure 3). In addition to the disordered pentane molecule, a molecule of CH2Cl2 was also found to be disordered. The routine SQUEEZE as found in PLATON98 was used to remove the solvent contributions from the data.4 The function, w(|Fo|2 - |Fc|2)2, was minimized, where w = 1/[((Fo))2 + (0.098*P)2 + (0.7656*P)] and P = (|Fo|2 + 2|Fc|2)/3. Rw(F2) refined to 0**.**177, with R(F) equal to 0.0649 and a goodness of fit, S, = 1.129. Definitions used for calculating R(F),Rw(F2) and the goodness of fit, S, are given below.5 The data were corrected for secondary extinction effects. The correction takes the form: Fcorr = kFc/[1 + (5.2(12)x10-6)* Fc2 3/(sin2)]0.25 where k is the overall scale factor. Neutral atom scattering factors and values used to calculate the linear absorption coefficient are from the International Tables for X-ray Crystallography (1992).6 All figures were generated using SHELXTL/PC.7

**References**

1. DENZO-SMN. (1997). Z. Otwinowski and W. Minor, Methods in Enzymology, **276**: Macromolecular Crystallography, part A, 307 – 326, C. W. Carter, Jr. and R. M. Sweets, Editors, Academic Press.
2. SIR97. (1999). A program for crystal structure solution. Altomare, A., Burla, M. C., Camalli, M., Cascarano, G. L., Giacovazzo, C., Guagliardi, A., Moliterni, A. G. G., Polidori, G. and Spagna, R. J. Appl. Cryst. 32, 115-119.
3. Sheldrick, G. M. (1994). SHELXL97. Program for the Refinement of Crystal Structures. University of Gottingen, Germany.
4. Spek, A. L. (1998). PLATON, A Multipurpose Crystallographic Tool. Utrecht University, The Netherlands.
5. WinGX 1.64. (1999). An Integrated System of Windows Programs for the Solution, Refinement and Analysis of Single Crystal X-ray Diffraction Data. Farrugia, L. J. J. Appl. Cryst. 32. 837-838.
6. Rw(F2) = {w(|Fo|2 - |Fc|2)2/w(|Fo|)4}1/2 where w is the weight given each reflection.

R(F) = (|Fo| - |Fc|)/|Fo|} for reflections with Fo > 4((Fo)).

S = [w(|Fo|2 - |Fc|2)2/(n - p)]1/2, where n is the number of reflections and p is the number of refined parameters.

1. International Tables for X-ray Crystallography (1992). Vol. C, Tables 4.2.6.8 and 6.1.1.4, A. J. C. Wilson, editor, Boston: Kluwer Academic Press.

Figure 5. View of molecule 1 of **6** showing a partial atom labeling scheme. Thermal ellipsoids are scaled to the 50% probability level. Dashed lines indicate H-bonding interactions. The geometry of these interactions are: N2-H2N…F2, N…F 2.881(3)Å, H…F 2.12(3)Å, N-H…F 140(2); N2-H2N…F3, N…F 2.827(3)Å, H…F 2.02(3)Å, N-H…F 146(2); N5-H5N…F2, N…F 2.843(3)Å, H…F 2.12(3)Å, N-H…F 142(3); N5-H5N…F3, N…F 2.842(3)Å, H…F 2.15(3)Å, N-H…F 137(3).

II.3 (BF2)2amethyrin complex **8**

Table 3. Crystal data and structure refinement for **8**.

Empirical formula C53 H58 B2 Cl6 F4 N8

Formula weight 1117.39

Temperature 153(2) K

Wavelength 0.71073 Å

Crystal system Triclinic

Space group P-1

Unit cell dimensions a = 12.1909(2) Å = 93.425(1)°.

b = 13.2259(2) Å = 103.208(1)°.

c = 19.4190(3) Å  = 99.454(1)°.

Volume 2991.34(8) Å3

Z 2

Density (calculated) 1.241 Mg/m3

Absorption coefficient 0.340 mm-1

F(000) 1160

Crystal size 0.28 x 0.20 x 0.15 mm

Theta range for data collection 2.95 to 27.50°.

Index ranges -15<=h<=15, -17<=k<=17, -25<=l<=25

Reflections collected 25852

Independent reflections 13719 [R(int) = 0.0457]

Completeness to theta = 27.50° 99.8 %

Absorption correction None

Refinement method Full-matrix least-squares on F2

Data / restraints / parameters 13719 / 0 / 578

Goodness-of-fit on F2 2.371

Final R indices [I>2sigma(I)] R1 = 0.0819, wR2 = 0.1668

R indices (all data) R1 = 0.1344, wR2 = 0.1707

Extinction coefficient 1.21(11)x10-5

Largest diff. peak and hole 0.344 and -0.307 e.Å-3

X-ray Experimental for C50H54N8B2F4 - 3CH2Cl2: Crystals grew as metallic blue plates by vapor diffusion of hexanes into a methylene chloride solution of the macrocycle. The data crystal was plate that had approximate dimensions; 0.28 x 0.20 x 0.15 mm. The data were collected on a Nonius Kappa CCD diffractometer using a graphite monochromator with MoK radiation ( = 0.71073Å). A total of 625 frames of data were collected using -scans with a scan range of 1 and a counting time of 93 seconds per frame. The data were collected at 153 K using an Oxford Cryostream low temperature device. Details of crystal data, data collection and structure refinement are listed in Table 1. Data reduction were performed using DENZO-SMN.1 The structure was solved by direct methods using SIR972 and refined by full-matrix least-squares on F2 with anisotropic displacement parameters for the non-H atoms using SHELXL-97.3 The hydrogen atoms were calculated in ideal positions with isotropic displacement parameters set to 1.2xUeq of the attached atom (1.5xUeq for methyl hydrogen atoms).

There were three regions around the macrocycle where a molecule of methylene chloride resided. These molecules were poorly resolved due to either disorder or high thermal motion and were difficult to model. As a result, the contribution to the scattering due to these solvate molecules were removed by use of the utility SQUEEZE,4 as found in WinGX.5

The function, w(|Fo|2 - |Fc|2)2, was minimized, where w = 1/[((Fo))2 + (0.02*P)2] and P = (|Fo|2 + 2|Fc|2)/3. Rw(F2) refined to 0**.**171, with R(F) equal to 0.0819 and a goodness of fit, S, = 2.37. Definitions used for calculating R(F), Rw(F2) and the goodness of fit, S, are given below.6 The data were corrected for secondary extinction effects. The correction takes the form: Fcorr = kFc/[1 + (1.21(11)x10-5)* Fc2 3/(sin2)]0.25 where k is the overall scale factor. Neutral atom scattering factors and values used to calculate the linear absorption coefficient are from the International Tables for X-ray Crystallography (1992).7 All figures were generated using SHELXTL/PC.8

**References**

1. DENZO-SMN. (1997). Z. Otwinowski and W. Minor, Methods in Enzymology, **276**: Macromolecular Crystallography, part A, 307 – 326, C. W. Carter, Jr. and R. M. Sweets, Editors, Academic Press.
2. SIR97. (1999). A program for crystal structure solution. Altomare, A., Burla, M. C., Camalli, M., Cascarano, G. L., Giacovazzo, C., Guagliardi, A., Moliterni, A. G. G., Polidori, G. and Spagna, R. J. Appl. Cryst. 32, 115-119.
3. Sheldrick, G. M. (1994). SHELXL97. Program for the Refinement of Crystal Structures. University of Gottingen, Germany.
4. Spek, A. L. (1998). PLATON, A Multipurpose Crystallographic Tool. Utrecht University, The Netherlands.
5. WinGX 1.64. (1999). An Integrated System of Windows Programs for the Solution, Refinement and Analysis of Single Crystal X-ray Diffraction Data. Farrugia, L. J. J. Appl. Cryst. 32. 837-838.
6. Rw(F2) = {w(|Fo|2 - |Fc|2)2/w(|Fo|)4}1/2 where w is the weight given each reflection.

R(F) = (|Fo| - |Fc|)/|Fo|} for reflections with Fo > 4((Fo)).

S = [w(|Fo|2 - |Fc|2)2/(n - p)]1/2, where n is the number of reflections and p is the number of refined parameters.

1. International Tables for X-ray Crystallography (1992). Vol. C, Tables 4.2.6.8 and 6.1.1.4, A. J. C. Wilson, editor, Boston: Kluwer Academic Press.
2. Sheldrick, G. M. (1994). SHELXTL/PC (Version 5.03). Siemens Analytical X-ray Instruments, Inc., Madison, Wisconsin, USA.

Figure 6. View of **8** showing the atom labeling scheme. Displacement ellipsoids are scaled to the 50% probability level. Most hydrogen atoms have been removed for clarity. Dashed lines are indicative of H-bonding interactions.
